# Supplementary material for: Embryo-specific expression of a visual reporter gene as a selection system for citrus transformation
Source: PubMed Central journal article supplement (PMC5749800; doi:10.1371/journal.pone.0190413), 2018-01-02

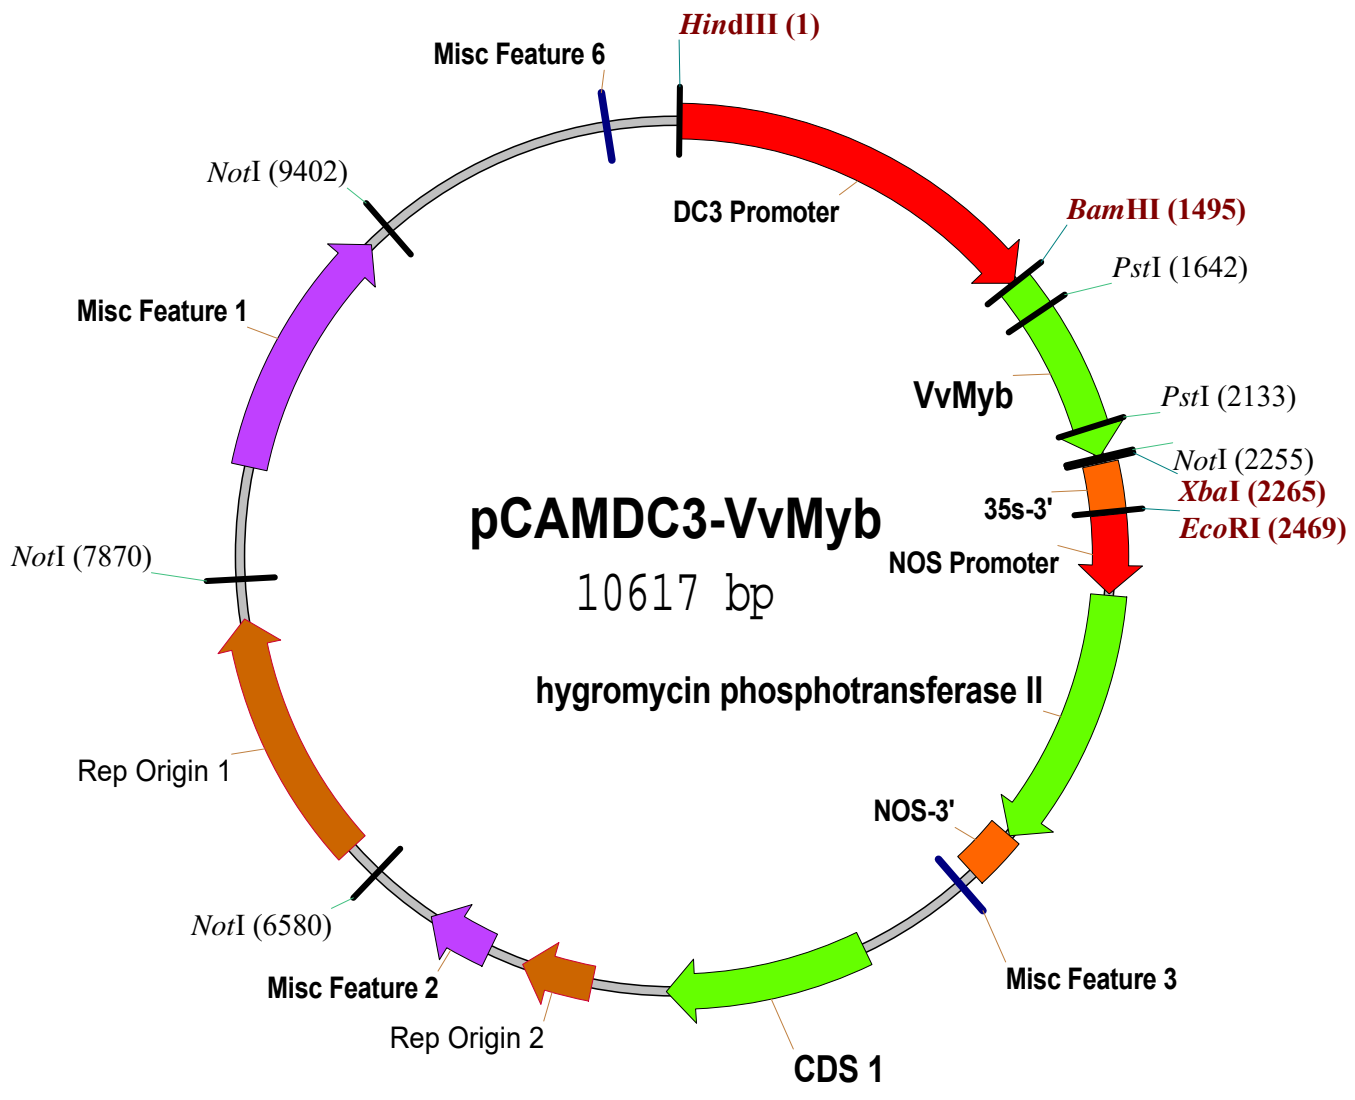

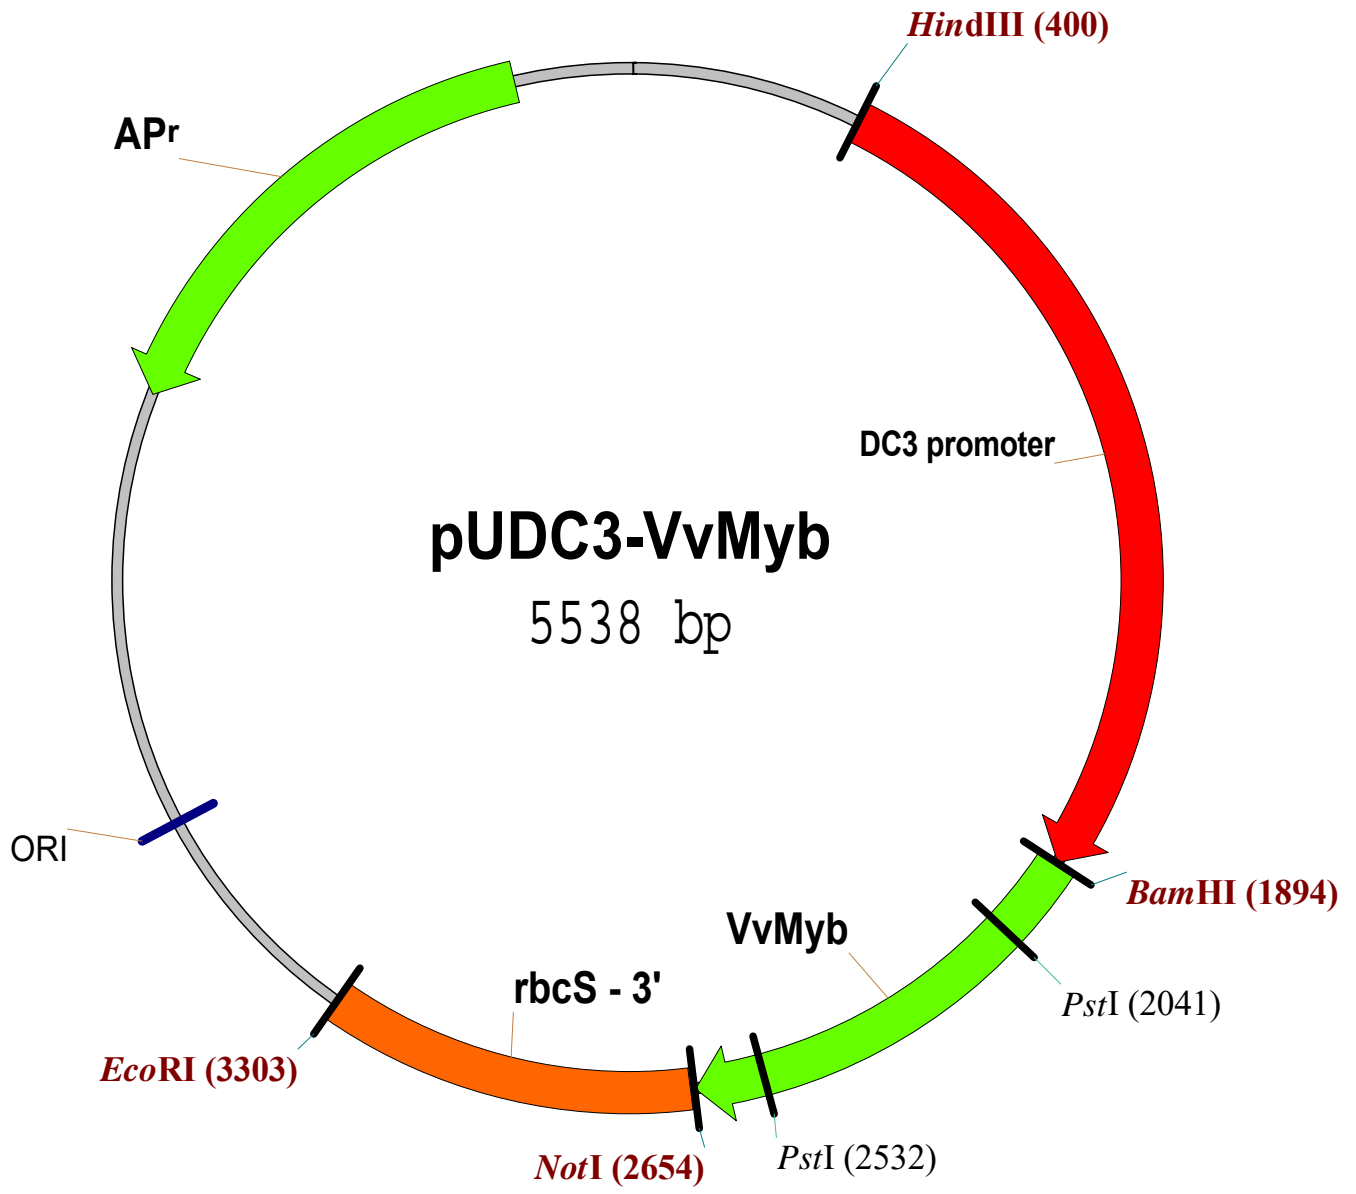

Supplement: pone.0190413.s001.pdf [file pone.0190413.s001.pdf]
